# Supplementary material for: Expression of the Malus sieversii NF-YB21 Encoded Gene Confers Tolerance to Osmotic Stresses in Arabidopsis thaliana
Source: MDPI journal article supplement (doi:10.3390/ijms22189777), 2021-09-10
Supplement: s1 [file s1]

**Table S6 RT-qPCR primers**

| <b>Gene</b> | <b>Forward primer(5' to 3')</b> | <b>Reverse primer( 5' to 3')</b> |
|-------------|---------------------------------|----------------------------------|
| MdNF-YA1    | TGCTTCTAACAAAATGGTGGCAT         | GGCGCAGTGCTTAGCTGATT             |
| MdNF-YA2    | CCTACAGTGCGTGATGATTGC           | AGAAAAGGAGGATAACCCAAAGGT         |
| MdNF-YA3    | TTCTGTGCGCCATCATTCTG            | CGGGATGAGACATTCCAATTGC           |
| MdNF-YA4    | ACACTCTAATGGTAATGGCAACGAT       | TCGTAGAGGGACCTCATTACTGG          |
| MdNF-YA5    | CAAATTGATGTTAGCCGTTCAATTGG      | GGAGTTATCCCCACCACCTG             |
| MdNF-YA6    | TTGTCATGAATCTCGACACCAG          | TCATCCGGTTGGTTCCCA               |
| MdNF-YA7    | AGCTTATGGACATCAGCCTTTG          | GTCTTCGCCTTAGAATCCCTTG           |
| MdNF-YA8    | ACCAGGGAACAGCCCAATA             | GCTGAATCCAAGCTCAAAATG            |
| MdNF-YA9    | CCACAAGGTTATCATGACGCA           | TCCCATCAGCACCCCTACCA             |
| MdNF-YB1    | CGGTGTTGATAAATGGTAGTAAGCA       | GAGAGACAGAGGGGAAGGTGAA           |
| MdNF-YB2    | GTCGGGTGGTCCTCAACGA             | GTTGGCTATCGGCATGTATCG            |
| MdNF-YB3    | TCCGAGTACATCGCCTTCATAACC        | AGTTGTCAAACCCGAGCTTTCC           |
| MdNF-YB4    | TAACTGCTGAAGCCAACCAG            | AGCGATGGAGGAAAACGTTG             |
| MdNF-YB5    | TACGTGGAGCCTCTGAAGGTT           | CATACCCAACCCACCATTCCC            |
| MdNF-YB6    | CTGAAGTTTCACCACCAAGGAC          | GAGAGCGAGCTATTTCCCCTT            |
| MdNF-YB7    | CCAGGAATGCGTTTCTGAGTTC          | AAAGTTGCCATTGCCCAGAG             |
| MdNF-YB8    | ACAACAACCAAAACACGGCAA           | TCTCAAGCACCCGAAACTCC             |
| MdNF-YB9    | TTGCAAACGTGAGCAGGATC            | TGAAGCTGATGAACTCGGAGAC           |
| MdNF-YB10   | AAGGAAACCATCCAAGAGTGCG          | TGCAGGTAGAGGGTGAGTGGC            |
| MdNF-YB11   | TCACCAGCGAGGCAAGCG              | ACCCTCCCTGTACCTACTCAAGTAAATC     |
| MdNF-YB12   | CAACGGCGACGATTTGCTAT            | GCCCTCCATCTCCCATACTT             |
| MdNF-YB13   | GGAAACCATCCAAGAGTGCGT           | TGCAGGTAGAGGGTGAGTGGC            |
| MdNF-YB14   | GTCCGAGTACATCGCCTTCATAAC        | GTAATTGTCAAACCCGAGCTTTCC         |
| MdNF-YB15   | ACGGCGACGATTTGCTCTG             | CTTCTCCCCTTCCATCTCCCTA           |
| MdNF-YB16   | CGATGATTACGCTGAGCCAC            | GTCCTTGGTGGCAGTTTGTTT            |
| MdNF-YB17   | CTAAGAAAGATGTTTCAGCCAAGTCC      | CATCTCAAACGGGCAGCTAAATT          |
| MdNF-YB18   | TGCTCCCAATTGCAAACGTG            | AGCCTCGCCAGTTACAAAAC             |
| MdNF-YB19   | AAAGGATGATGATATTGATGGAGGC       | TCTTGGCGTTGGGTGGC                |
| MdNF-YB20   | AAGTGTCCAAGAATGCGTCTCC          | GTTGTGATAGCCCAAATGATGTCC         |
| MdNF-YB21   | GCCAGAGAAGAAGACCACCC            | CTGTCGTCCCCCAACTGAAT             |
| MdNF-YB22   | CAGGAGTGCGTGTCGGAG              | GTGGTCATCGCCCATAGCAAATC          |
| MdNF-YC1    | CCATGAGACTGAATCTGAACCCT         | CATCATCCGCCACCATTCCA             |
| MdNF-YC2    | GCCCACCGCCTGTTTG                | CAGACTGCATAGCTCCCACTG            |
| MdNF-YC3    | CAAGTTCTGGCCAAATGGCATCA         | CTGCGATGGGGAAGTGACG              |
| MdNF-YC4    | CCACCCTCGAAGGGAAGAGG            | AGCACGACCCCGAAACCAA              |
| MdNF-YC5    | CTACCCAGCAACCCAATCCT            | CGGCAGCTGGTGATTCTTGA             |
| MdNF-YC6    | ATACCCGTTTTCTGCTGCC             | TGCAAGAATAGCTCCAACGC             |
| MdNF-YC7    | CAGTTGGTGTCGTAGCAGGTT           | CTGATGTGACGGATCAGGGA             |
| MdNF-YC8    | AAACCCAAGAACCTCCCAGAA           | CGACTCGGAAACATCCATCT             |
| MdNF-YC9    | GTGGGAAAGCCTGTGATGGA            | TTGTTGCTGTGGCCATGTTG             |
| MdNF-YC10   | TACCCAGCAACCCAATCCTC            | CTCTCAATCTCCTGGCGCTG             |
| MdNF-YC11   | ATTTCTTCGCCCTGCACTGT            | GTCATGTGGGAAGTGTGGGA             |

|            |                               |                                      |
|------------|-------------------------------|--------------------------------------|
| MdNF-YC12  | TGCATCAATCCCAAGAGGTGG         | TATTCTGATTCCCCGGAGCAC                |
| Histone H3 | TGAAGAAGCCCCACAGATA           | GTCAGTCTTGAAGTCCTGCG                 |
| AtFSD1     | CCTCAAGAAACAGGTTCTTGGAACCG    | GGTCATGAATGTCTTTATGTAATC             |
| AtFSD2     | GGAACCGCATATGAGCCGGGAAACC     | CTTGTCTTCCTCCTTTGGGAGAGG             |
| AtFSD3     | GGTGGTTTAAAGGTTGAAGCTTACTACGG | CCTTATCAATCTGCTCAAGAACACCC           |
| AtCSD1     | TGGTAGTTGTGTGTATCTTCTGGTGTGTG | TGAAAGTACCATATCCAGGACTCTTGTTACC      |
| AtCSD2     | GCAGCAGCCATGGCTGCCACC         | GGCCCTGGAGTGAGACCAGTG                |
| AtCSD3     | CGGGAGGGCGGTTGTTGTGCATGCGG    | CTGAGTGTGGCTCTGTCCGTTGATCTCAAAAGCTAT |
| AtMSD      | CCACCAAAAGGATCTCTTGGTAGTGCC   | CCTCGCTTGCATATTTCCAGTTGATCAC         |
| AtCAT1     | AGGAGCCAATCACAGCC             | TCAAGACCAAGCGACCA                    |
| AtCAT2     | AACTCCGCCTGCTGTCTG            | ATAGGGCATCAATCCATC                   |
| AtCAT3     | TCACAGCCACGCCACTAA            | AGAACCAAGCGACCAACC                   |
| AtPER12    | CCTCAACATCACCGACTTAGTA        | CTCCTTATGTCATTCACTTGCG               |
| AtPER34    | ATCGTCCTTCTGATCTCGTTGCT       | GATCAAAATCTACCAAGGCACTTC             |
| AtPER42    | GAAGAACTCACTGTGTCAAGCT        | AACCCTTGTTGTCTAGGATGTT               |
| AtPER51    | ATTCTCTCTCTTTTCTCGCCATCA      | AAGTGCATTGAGTTGGTTGAGATCA            |
| AtACT2     | CTCCTTTGTTGCTGTTGACTAC        | GCACAATGTTACCGTACAGATC               |

---
