# Supplementary material for: Expression of the Malus sieversii NF-YB21 Encoded Gene Confers Tolerance to Osmotic Stresses in Arabidopsis thaliana
Source: MDPI journal article supplement (doi:10.3390/ijms22189777), 2021-09-10
Supplement: s1 [file s1]

**Table S1** Basic information of 43 *MdNF-Y* members

| Name             | Gene ID      | Chromosome local         | CDS length | No. of AA | pI    | MW (Kda) | GRAVY  | Subcellular localization prediction |
|------------------|--------------|--------------------------|------------|-----------|-------|----------|--------|-------------------------------------|
| NF-YA subunit    |              |                          |            |           |       |          |        |                                     |
| <i>MdNF-YA1</i>  | MD02G1086200 | Chr2:6760401..6763923    | 927        | 308       | 8.552 | 33.93    | -0.699 | Nucleus.                            |
| <i>MdNF-YA2</i>  | MD03G1174600 | Chr3:23867258..23872067  | 1077       | 358       | 6.394 | 38.86    | -0.994 | Nucleus.                            |
| <i>MdNF-YA3</i>  | MD05G1273300 | Chr5:40831929..40836805  | 414        | 137       | 9.284 | 15.6     | -1.088 | Nucleus.                            |
| <i>MdNF-YA4</i>  | MD07G1011300 | Chr7:1023634..1029101    | 840        | 279       | 7.909 | 30.58    | -0.905 | Nucleus.                            |
| <i>MdNF-YA5</i>  | MD09G1186200 | Chr9:16163341..16168480  | 897        | 298       | 8.81  | 32.86    | -0.619 | Nucleus.                            |
| <i>MdNF-YA6</i>  | MD10G1253300 | Chr10:34584154..34588714 | 627        | 208       | 7.746 | 22.82    | -0.963 | Nucleus.                            |
| <i>MdNF-YA7</i>  | MD11G1192400 | Chr11:27332752..27339954 | 1047       | 348       | 7.711 | 37.92    | -1.109 | Nucleus.                            |
| <i>MdNF-YA8</i>  | MD14G1041300 | Chr14:3873166..3878129   | 930        | 309       | 9.05  | 33.94    | -0.679 | Nucleus.                            |
| <i>MdNF-YA9</i>  | MD15G1213400 | Chr15:17122823..17125801 | 903        | 300       | 8.63  | 33.21    | -0.589 | Nucleus.                            |
| NF-YB subunit    |              |                          |            |           |       |          |        |                                     |
| <i>MdNF-YB1</i>  | MD01G1112400 | Chr1:22658861..22662399  | 645        | 214       | 8.11  | 22.93    | -0.507 | Nucleus.                            |
| <i>MdNF-YB2</i>  | MD02G1191900 | Chr2:17939911..17940645  | 735        | 244       | 5.136 | 27.02    | -0.776 | Nucleus.                            |
| <i>MdNF-YB3</i>  | MD02G1192100 | Chr2:18023631..18025409  | 1044       | 347       | 4.795 | 38.13    | -0.482 | Nucleus.                            |
| <i>MdNF-YB4</i>  | MD03G1179600 | Chr3:24691097..24691663  | 567        | 188       | 4.781 | 20.69    | -0.428 | Nucleus.                            |
| <i>MdNF-YB5</i>  | MD03G1183400 | Chr3:25025010..25025594  | 585        | 194       | 6.21  | 20.84    | -0.837 | Nucleus.                            |
| <i>MdNF-YB6</i>  | MD03G1283700 | Chr3:36413956..36414516  | 561        | 186       | 6.401 | 20.95    | -0.895 | Nucleus.                            |
| <i>MdNF-YB7</i>  | MD04G1104700 | Chr4:19216567..19220090  | 525        | 174       | 6.538 | 18.78    | -0.884 | Nucleus.                            |
| <i>MdNF-YB8</i>  | MD04G1203300 | Chr4:28953974..28954426  | 453        | 150       | 6.068 | 16.86    | -0.749 | Nucleus.                            |
| <i>MdNF-YB9</i>  | MD05G1361000 | Chr5:47685520..47685846  | 327        | 108       | 5.136 | 11.91    | -0.694 | Nucleus.                            |
| <i>MdNF-YB10</i> | MD05G1361600 | Chr5:47696633..47698977  | 876        | 291       | 6.328 | 31.27    | -0.627 | Nucleus.                            |
| <i>MdNF-YB11</i> | MD07G1180200 | Chr7:25950191..25953495  | 648        | 215       | 8.11  | 23.16    | -0.541 | Nucleus.                            |
| <i>MdNF-YB12</i> | MD09G1126900 | Chr9:9795758..9796411    | 654        | 217       | 6.845 | 22.18    | -0.735 | Nucleus.                            |
| <i>MdNF-YB13</i> | MD10G1339000 | Chr10:41496215..41496999 | 744        | 247       | 6.644 | 27.35    | -0.601 | Nucleus.                            |

|                  |              |                          |     |     |       |       |        |                     |
|------------------|--------------|--------------------------|-----|-----|-------|-------|--------|---------------------|
| <i>MdNF-YB14</i> | MD11G1199300 | Chr11:28769434..28769985 | 552 | 183 | 5.409 | 20.25 | -0.667 | Nucleus.            |
| <i>MdNF-YB15</i> | MD11G1200400 | Chr11:28876837..28877409 | 573 | 190 | 6.766 | 20.09 | -0.684 | Nucleus.            |
| <i>MdNF-YB16</i> | MD11G1302500 | Chr11:41788083..41788580 | 498 | 165 | 6.109 | 18.6  | -0.92  | Nucleus.            |
| <i>MdNF-YB17</i> | MD12G1124800 | Chr12:19970949..19980773 | 393 | 130 | 5.664 | 14.28 | -0.874 | Nucleus.            |
| <i>MdNF-YB18</i> | MD12G1217100 | Chr12:29460289..29460741 | 462 | 153 | 7.188 | 16.79 | -0.727 | Nucleus.            |
| <i>MdNF-YB19</i> | MD13G1170200 | Chr13:13815353..13815826 | 474 | 157 | 6.071 | 17.51 | -0.91  | Nucleus.            |
| <i>MdNF-YB20</i> | MD15G1134600 | Chr15:9778391..9779101   | 711 | 236 | 6.217 | 26.72 | -1.01  | Nucleus.            |
| <i>MdNF-YB21</i> | MD15G1334200 | Chr15:37152321..37152947 | 627 | 208 | 6.821 | 23.01 | -0.86  | Nucleus.            |
| <i>MdNF-YB22</i> | MD17G1117200 | Chr17:10167264..10168240 | 720 | 239 | 5.292 | 24.81 | -0.65  | Nucleus.            |
| NF-YC subunit    |              |                          |     |     |       |       |        |                     |
| <i>MdNF-YC1</i>  | MD02G1273400 | Chr2:32804138..32809135  | 999 | 332 | 4.982 | 36.01 | -0.704 | Nucleus.            |
| <i>MdNF-YC2</i>  | MD04G1207500 | Chr4:29269117..29271406  | 807 | 268 | 5.858 | 29.75 | -0.578 | Cytoplasm. Nucleus. |
| <i>MdNF-YC3</i>  | MD05G1229600 | Chr5:36298931..36300862  | 807 | 268 | 5.16  | 29.72 | -0.478 | Cytoplasm. Nucleus. |
| <i>MdNF-YC4</i>  | MD06G1078500 | Chr6:19362575..19362940  | 366 | 121 | 7.078 | 13.37 | -0.161 | Cytoplasm. Nucleus. |
| <i>MdNF-YC5</i>  | MD06G1141200 | Chr6:28495891..28498876  | 720 | 239 | 5.046 | 25.83 | -0.409 | Nucleus.            |
| <i>MdNF-YC6</i>  | MD07G1042300 | Chr7:3543314..3555874    | 978 | 325 | 4.927 | 34.99 | -0.683 | Nucleus.            |
| <i>MdNF-YC7</i>  | MD10G1208800 | Chr10:30806582..30809166 | 834 | 277 | 5.568 | 31.17 | -0.636 | Nucleus.            |
| <i>MdNF-YC8</i>  | MD12G1221800 | Chr12:29861745..29864137 | 789 | 262 | 5.53  | 29.22 | -0.617 | Cytoplasm. Nucleus. |
| <i>MdNF-YC9</i>  | MD13G1185200 | Chr13:15766106..15768771 | 756 | 251 | 5.622 | 28.01 | -0.643 | Cytoplasm. Nucleus. |
| <i>MdNF-YC10</i> | MD14G1156400 | Chr14:25090589..25093134 | 717 | 238 | 4.925 | 25.78 | -0.405 | Cytoplasm. Nucleus. |
| <i>MdNF-YC11</i> | MD15G1159400 | Chr15:11916470..11917171 | 702 | 233 | 5.176 | 26.52 | -0.157 | Nucleus.            |
| <i>MdNF-YC12</i> | MD16G1185900 | Chr16:16034439..16037111 | 699 | 232 | 5.62  | 26.06 | -0.673 | Cytoplasm. Nucleus. |

#### Notes:

As for the three subunit family members, the lengths of MdNF-YAs ranging from 137-358 AA (average length 282.78 AA) were the longest, the lengths of MdNF-YCs ranging from 121-332 AA (average length 253.83 AA) were shorter, the lengths of MdNF-YBs ranging from 108-347 AA (average length 201.64 AA) were the shortest. The predicted theoretical isoelectric points (pI) of the 43 MdNF-Ys ranged from 4.78 (MdNF-

YB4) to 9.28 (MdNF-YA3). The results of subcellular locations prediction showed that, all MdNF-YA and MdNF-YB proteins and part of MdNF-YC proteins (MdNF-YC1/5/6/7/11) were predicted to be nuclear proteins, while the rest of MdNF-YC proteins were predicted to be nuclear and cytosolic proteins (Table 1). The GRAVY score of MdNF-Y proteins were negative, suggesting that these proteins were hydrophilic.
