# Supplementary material for: Expression of the Malus sieversii NF-YB21 Encoded Gene Confers Tolerance to Osmotic Stresses in Arabidopsis thaliana
Source: MDPI journal article supplement (doi:10.3390/ijms22189777), 2021-09-10
Supplement: s1 [file s1]

**Table S7 Primers for constructing vectors**

| <b>Gene</b>    | <b>Forward primer(5' to 3')</b>                           | <b>Reverse primer( 5' to 3')</b>                           |
|----------------|-----------------------------------------------------------|------------------------------------------------------------|
| MsNF-YB21      | ATGAGTGGAAAAAGAAATCAAACGTGT                               | CTACCATCCTATCCCGTTATGAATATGATG                             |
| MdNF-YC8       | ATGGATCCGCAAGGGCATA                                       | CTAATGATCTGATGGCGACTGC                                     |
| BD-MsNF-YB21   | TGATCTCAGAGGAGGACCTGCATATGATGAGTGG<br>AAAAAGAAATCAAACGTGT | TAGTTATGCGGCCGCTGCAGGTCGACGCCAT<br>CCTATCCCGTTATGAATATGATG |
| AD-MsNF-YC8    | ACGACGTACCAGATTACGCTCATATGATGGATCCG<br>CAAGGGCATA         | ATCTGCAGCTCGAGCTCGATGGATCCCATGA<br>TCTGATGGCGACTGC         |
| BiFC-MsNF-YB21 | GGATCCATCGATAGTACTGTCTGACATGAGTGGAA<br>AAAGAAATCAAACGTGT  | TTGCTCCATCCCGGGAGCGGTACCCCATCCT<br>ATCCCGTTATGAATATGATG    |
| BiFC-MsNF-YC8  | GGATCCATCGATAGTACTGTCTGACATGGATCCGCA<br>AGGGCATA          | TGGGTACATCCCGGGAGCGGTACCATGATCT<br>GATGGCGACTGC            |
| GFP-MsNF-YB21  | ACGGGGGACTCTTGACCCATGGTAATGAGTGGAA<br>AAAGAAATCAAACGTGT   | TTCTCCTTTACTAGTCAGATCTACCCATCCTA<br>TCCCGTTATGAATATGATG    |
