# Supplementary material for: Expression of the Malus sieversii NF-YB21 Encoded Gene Confers Tolerance to Osmotic Stresses in Arabidopsis thaliana
Source: MDPI journal article supplement (doi:10.3390/ijms22189777), 2021-09-10
Supplement: s1 [file s1]

**Table S4 *Cis*-elements analysis of MdNF-Y promoter sequences**

| Gene name        | ABRE | CGTCA-motif | DRE | GARE | LTR | MBS | P-Box | TCA-element | TGACG-motif | WUN | G-Box | W-Box |
|------------------|------|-------------|-----|------|-----|-----|-------|-------------|-------------|-----|-------|-------|
| <i>MdNF-YA1</i>  | 1    | 0           | 2   | 0    | 0   | 1   | 0     | 1           | 0           | 0   | 1     | 0     |
| <i>MdNF-YA2</i>  | 3    | 2           | 0   | 0    | 3   | 0   | 0     | 0           | 2           | 1   | 3     | 2     |
| <i>MdNF-YA3</i>  | 0    | 1           | 0   | 0    | 1   | 0   | 0     | 1           | 1           | 0   | 0     | 2     |
| <i>MdNF-YA4</i>  | 1    | 1           | 0   | 0    | 0   | 2   | 0     | 2           | 1           | 0   | 0     | 0     |
| <i>MdNF-YA5</i>  | 4    | 0           | 0   | 1    | 0   | 1   | 1     | 3           | 0           | 2   | 4     | 0     |
| <i>MdNF-YA6</i>  | 1    | 0           | 1   | 1    | 3   | 1   | 1     | 1           | 0           | 0   | 3     | 0     |
| <i>MdNF-YA7</i>  | 5    | 2           | 0   | 0    | 2   | 2   | 0     | 0           | 2           | 1   | 5     | 1     |
| <i>MdNF-YA8</i>  | 1    | 0           | 0   | 0    | 1   | 0   | 1     | 0           | 0           | 0   | 1     | 2     |
| <i>MdNF-YA9</i>  | 3    | 0           | 0   | 1    | 0   | 1   | 0     | 0           | 0           | 0   | 4     | 0     |
| <i>MdNF-YB1</i>  | 3    | 1           | 0   | 0    | 0   | 2   | 0     | 1           | 1           | 0   | 1     | 1     |
| <i>MdNF-YB2</i>  | 2    | 0           | 0   | 1    | 0   | 0   | 0     | 0           | 0           | 3   | 2     | 0     |
| <i>MdNF-YB3</i>  | 3    | 1           | 0   | 0    | 1   | 0   | 0     | 0           | 1           | 0   | 4     | 2     |
| <i>MdNF-YB4</i>  | 3    | 0           | 0   | 0    | 0   | 0   | 1     | 2           | 0           | 1   | 4     | 1     |
| <i>MdNF-YB5</i>  | 5    | 3           | 0   | 0    | 0   | 0   | 1     | 1           | 3           | 2   | 5     | 0     |
| <i>MdNF-YB6</i>  | 5    | 0           | 0   | 0    | 0   | 0   | 0     | 0           | 0           | 0   | 5     | 0     |
| <i>MdNF-YB7</i>  | 2    | 1           | 1   | 0    | 2   | 0   | 0     | 1           | 1           | 1   | 2     | 1     |
| <i>MdNF-YB8</i>  | 8    | 4           | 1   | 0    | 0   | 0   | 0     | 0           | 4           | 1   | 7     | 1     |
| <i>MdNF-YB9</i>  | 6    | 1           | 1   | 0    | 0   | 2   | 0     | 1           | 0           | 0   | 6     | 0     |
| <i>MdNF-YB10</i> | 5    | 1           | 0   | 0    | 1   | 0   | 1     | 0           | 1           | 0   | 6     | 1     |
| <i>MdNF-YB11</i> | 0    | 0           | 0   | 0    | 0   | 1   | 0     | 1           | 0           | 1   | 1     | 1     |
| <i>MdNF-YB12</i> | 6    | 1           | 0   | 0    | 0   | 2   | 0     | 1           | 1           | 0   | 9     | 1     |

|                  |   |   |   |   |   |   |   |   |   |   |    |   |
|------------------|---|---|---|---|---|---|---|---|---|---|----|---|
| <i>MdNF-YB13</i> | 2 | 1 | 0 | 0 | 0 | 1 | 1 | 3 | 0 | 2 | 4  | 0 |
| <i>MdNF-YB14</i> | 2 | 0 | 0 | 0 | 0 | 0 | 1 | 0 | 0 | 0 | 3  | 0 |
| <i>MdNF-YB15</i> | 5 | 2 | 0 | 0 | 0 | 1 | 1 | 0 | 0 | 0 | 6  | 0 |
| <i>MdNF-YB16</i> | 7 | 2 | 0 | 0 | 0 | 0 | 1 | 0 | 2 | 0 | 8  | 0 |
| <i>MdNF-YB17</i> | 3 | 3 | 0 | 0 | 1 | 0 | 2 | 0 | 3 | 0 | 3  | 0 |
| <i>MdNF-YB18</i> | 6 | 0 | 0 | 0 | 0 | 1 | 0 | 1 | 0 | 2 | 4  | 1 |
| <i>MdNF-YB19</i> | 5 | 2 | 0 | 0 | 0 | 1 | 0 | 0 | 0 | 1 | 4  | 0 |
| <i>MdNF-YB20</i> | 2 | 2 | 3 | 0 | 0 | 0 | 1 | 3 | 0 | 0 | 5  | 2 |
| <i>MdNF-YB21</i> | 2 | 3 | 0 | 0 | 1 | 1 | 0 | 2 | 3 | 0 | 2  | 1 |
| <i>MdNF-YB22</i> | 1 | 0 | 0 | 0 | 1 | 1 | 0 | 0 | 2 | 1 | 3  | 1 |
| <i>MdNF-YC1</i>  | 2 | 0 | 0 | 0 | 2 | 0 | 0 | 1 | 0 | 2 | 4  | 3 |
| <i>MdNF-YC2</i>  | 1 | 1 | 0 | 0 | 2 | 0 | 0 | 0 | 1 | 1 | 1  | 0 |
| <i>MdNF-YC3</i>  | 4 | 4 | 1 | 0 | 1 | 1 | 0 | 1 | 4 | 1 | 5  | 0 |
| <i>MdNF-YC4</i>  | 8 | 3 | 0 | 0 | 1 | 1 | 0 | 0 | 3 | 2 | 11 | 1 |
| <i>MdNF-YC5</i>  | 1 | 0 | 0 | 0 | 1 | 1 | 0 | 1 | 0 | 0 | 0  | 0 |
| <i>MdNF-YC6</i>  | 7 | 2 | 0 | 0 | 2 | 1 | 0 | 0 | 2 | 1 | 8  | 2 |
| <i>MdNF-YC7</i>  | 7 | 1 | 2 | 0 | 1 | 1 | 0 | 0 | 1 | 1 | 5  | 1 |
| <i>MdNF-YC8</i>  | 1 | 1 | 0 | 0 | 2 | 0 | 0 | 0 | 1 | 0 | 1  | 0 |
| <i>MdNF-YC9</i>  | 0 | 2 | 1 | 0 | 2 | 1 | 2 | 0 | 0 | 1 | 2  | 3 |
| <i>MdNF-YC10</i> | 5 | 1 | 0 | 1 | 1 | 0 | 1 | 2 | 0 | 0 | 10 | 1 |
| <i>MdNF-YC11</i> | 3 | 0 | 1 | 0 | 0 | 1 | 0 | 0 | 0 | 3 | 4  | 2 |
| <i>MdNF-YC12</i> | 0 | 1 | 0 | 1 | 1 | 2 | 2 | 0 | 1 | 0 | 0  | 1 |

Notes: MBS represents MYB binding site; ABRE represents abscisic acid (ABA) responsive element; DRE represents dehydration responsive element; G-Box represent drought responsive element; W-Box represents WRKY binding site; LTR represents low temperature responsive element; WUN represents wound responsive element; GARE and P-Box represent gibberellin responsive elements; CGTCA motif and TGACG motif represent jasmonate acid responsive elements; TCA-element represents salicylic acid responsive element. In these *cis*-elements, five were reported related with the drought stress, including ABREs, MBSs, G-Boxes, W-Boxes and DREs (colored with red).
