# Supplementary material for: Expression of the Malus sieversii NF-YB21 Encoded Gene Confers Tolerance to Osmotic Stresses in Arabidopsis thaliana
Source: Int J Mol Sci. 2021 Sep 10;22(18):9777. doi: 10.3390/ijms22189777 (PMC8467963; doi:10.3390/ijms22189777)
Supplement: Supplementary file 1 [file ijms-22-09777-s001.zip]

Archive with 16 entries (16 files):
- Figure S1.jpg
- Figure S2.jpg
- Figure S3.tif
- Figure S4.tif
- Figure S5.jpg
- Figure S6.jpg
- Figure S7.tif
- Figure S8.tif
- Table S1 Basic information of 43 MdNF-Y members.pdf
- Table S2 The approximate time predictionof duplication events among the identified MdNF-Y genes in apple.xlsx
- Table S3 Correlated values of MdNF-Y nucleotide sequences.xlsx
- Table S4 Cis-elements analysis of MdNF-Y promoter sequences.pdf
- Table S5 Expression level of MsNF-Ys in different tissues and under drought treatment.xlsx
- Table S6 RT-qPCR primers.pdf
- Table S7 Primers for constructing vectors.pdf
- Table S8 Accession Numbers.xlsx
