# Supplementary material for: Expression of the Malus sieversii NF-YB21 Encoded Gene Confers Tolerance to Osmotic Stresses in Arabidopsis thaliana
Source: Int J Mol Sci. 2021 Sep 10;22(18):9777. doi: 10.3390/ijms22189777 (PMC8467963; doi:10.3390/ijms22189777)
Supplement: Supplementary file 1 [file ijms-22-09777-s001.zip › Table S2 The approximate time predictionof duplication events among the identified MdNF-Y genes in apple.xlsx]

## Sheet: Sheet1
Table S2 The approximate time predictionof duplication events among the identified MdNF-Y genes in apple
Gene Pairs Chromosome	Localization	Duplication Event	Identity Level (%)	Ka	Ks	Ka/Ks	T(Mya)
MdNF-YB5/MdNF-YB15	Chr3/Chr11	Segmental	76.9	0.0116439	0.200124	0.0581836	6.6708
MdNF-YB8/MdNF-YB18	Chr4/Chr12	Segmental	94.4	0.0364061	0.139418	0.26113	4.64726
MdNF-YC1/MdNF-YC6	Chr2/Chr7	Segmental	77.1	0.0770422	0.233104	0.330505	7.77014
MdNF-YC2/MdNF-YC8	Chr4/Chr12	Segmental	87.4	0.070948	0.275685	0.257352	9.1895
