# Supplementary material for: Expression of the Malus sieversii NF-YB21 Encoded Gene Confers Tolerance to Osmotic Stresses in Arabidopsis thaliana
Source: Int J Mol Sci. 2021 Sep 10;22(18):9777. doi: 10.3390/ijms22189777 (PMC8467963; doi:10.3390/ijms22189777)
Supplement: Supplementary file 1 [file ijms-22-09777-s001.zip › Table S3 Correlated values of MdNF-Y nucleotide sequences.xlsx]

## Sheet: MdNF-YAs
Gene ID	MdNF-YA1	MdNF-YA2	MdNF-YA3	MdNF-YA4	MdNF-YA5	MdNF-YA6	MdNF-YA7	MdNF-YA8	MdNF-YA9
MdNF-YA1	1	0.206	0.104	0.21	0.272	0.17	0.218	0.255	0.38
MdNF-YA2	0.206	1	0.102	0.225	0.212	0.163	0.406	0.232	0.217
MdNF-YA3	0.104	0.102	1	0.136	0.108	0.162	0.105	0.104	0.104
MdNF-YA4	0.21	0.225	0.136	1	0.277	0.204	0.209	0.226	0.255
MdNF-YA5	0.272	0.212	0.108	0.277	1	0.189	0.243	0.247	0.255
MdNF-YA6	0.17	0.163	0.162	0.204	0.189	1	0.168	0.181	0.166
MdNF-YA7	0.218	0.406	0.105	0.209	0.243	0.168	1	0.252	0.219
MdNF-YA8	0.255	0.232	0.104	0.226	0.247	0.181	0.252	1	0.244
MdNF-YA9	0.38	0.217	0.104	0.255	0.255	0.166	0.219	0.244	1

## Sheet: MdNF-YBs
Gene ID	MdNF-YB1	MdNF-YB2	MdNF-YB3	MdNF-YB4	MdNF-YB5	MdNF-YB6	MdNF-YB7	MdNF-YB8	MdNF-YB9	MdNF-YB10	MdNF-YB11	MdNF-YB12	MdNF-YB13	MdNF-YB14	MdNF-YB15	MdNF-YB16	MdNF-YB17	MdNF-YB18	MdNF-YB19	MdNF-YB20	MdNF-YB21	MdNF-YB22
MdNF-YB1	1	0.258	0.154	0.246	0.241	0.212	0.231	0.198	0.128	0.182	0.311	0.287	0.254	0.235	0.235	0.201	0.147	0.204	0.203	0.237	0.262	0.261
MdNF-YB2	0.258	1	0.173	0.21	0.247	0.205	0.204	0.182	0.136	0.213	0.258	0.225	0.275	0.206	0.235	0.171	0.144	0.176	0.161	0.272	0.221	0.246
MdNF-YB3	0.154	0.173	1	0.159	0.149	0.155	0.149	0.103	0.086	0.232	0.165	0.167	0.194	0.144	0.145	0.116	0.109	0.105	0.118	0.172	0.158	0.177
MdNF-YB4	0.246	0.21	0.159	1	0.247	0.246	0.271	0.192	0.171	0.166	0.24	0.232	0.192	0.539	0.261	0.192	0.183	0.197	0.218	0.213	0.236	0.212
MdNF-YB5	0.241	0.247	0.149	0.247	1	0.244	0.263	0.215	0.429	0.188	0.248	0.316	0.212	0.244	0.769	0.232	0.181	0.205	0.229	0.213	0.263	0.288
MdNF-YB6	0.212	0.205	0.155	0.246	0.244	1	0.235	0.238	0.158	0.146	0.251	0.218	0.221	0.224	0.247	0.29	0.18	0.237	0.228	0.195	0.228	0.186
MdNF-YB7	0.231	0.204	0.149	0.271	0.263	0.235	1	0.228	0.177	0.166	0.206	0.255	0.168	0.251	0.277	0.268	0.207	0.238	0.27	0.218	0.271	0.233
MdNF-YB8	0.198	0.182	0.103	0.192	0.215	0.238	0.228	1	0.209	0.159	0.186	0.157	0.163	0.206	0.221	0.271	0.256	0.944	0.261	0.154	0.199	0.152
MdNF-YB9	0.128	0.136	0.086	0.171	0.429	0.158	0.177	0.209	1	0.099	0.12	0.175	0.12	0.173	0.439	0.172	0.231	0.211	0.221	0.123	0.145	0.152
MdNF-YB10	0.182	0.213	0.232	0.166	0.188	0.146	0.166	0.159	0.099	1	0.178	0.21	0.226	0.172	0.179	0.155	0.15	0.156	0.135	0.214	0.195	0.216
MdNF-YB11	0.311	0.258	0.165	0.24	0.248	0.251	0.206	0.186	0.12	0.178	1	0.272	0.256	0.219	0.214	0.199	0.149	0.189	0.225	0.222	0.263	0.25
MdNF-YB12	0.287	0.225	0.167	0.232	0.316	0.218	0.255	0.157	0.175	0.21	0.272	1	0.255	0.203	0.319	0.188	0.166	0.155	0.218	0.234	0.276	0.663
MdNF-YB13	0.254	0.275	0.194	0.192	0.212	0.221	0.168	0.163	0.12	0.226	0.256	0.255	1	0.202	0.223	0.331	0.142	0.165	0.165	0.267	0.243	0.284
MdNF-YB14	0.235	0.206	0.144	0.539	0.244	0.224	0.251	0.206	0.173	0.172	0.219	0.203	0.202	1	0.254	0.204	0.193	0.202	0.202	0.185	0.256	0.18
MdNF-YB15	0.235	0.235	0.145	0.261	0.769	0.247	0.277	0.221	0.439	0.179	0.214	0.319	0.223	0.254	1	0.24	0.178	0.211	0.242	0.18	0.261	0.3
MdNF-YB16	0.201	0.171	0.116	0.192	0.232	0.29	0.268	0.271	0.172	0.155	0.199	0.188	0.331	0.204	0.24	1	0.176	0.259	0.255	0.192	0.22	0.166
MdNF-YB17	0.147	0.144	0.109	0.183	0.181	0.18	0.207	0.256	0.231	0.15	0.149	0.166	0.142	0.193	0.178	0.176	1	0.253	0.24	0.158	0.167	0.15
MdNF-YB18	0.204	0.176	0.105	0.197	0.205	0.237	0.238	0.944	0.211	0.156	0.189	0.155	0.165	0.202	0.211	0.259	0.253	1	0.255	0.163	0.205	0.15
MdNF-YB19	0.203	0.161	0.118	0.218	0.229	0.228	0.27	0.261	0.221	0.135	0.225	0.218	0.165	0.202	0.242	0.255	0.24	0.255	1	0.168	0.231	0.197
MdNF-YB20	0.237	0.272	0.172	0.213	0.213	0.195	0.218	0.154	0.123	0.214	0.222	0.234	0.267	0.185	0.18	0.192	0.158	0.163	0.168	1	0.265	0.247
MdNF-YB21	0.262	0.221	0.158	0.236	0.263	0.228	0.271	0.199	0.145	0.195	0.263	0.276	0.243	0.256	0.261	0.22	0.167	0.205	0.231	0.265	1	0.252
MdNF-YB22	0.261	0.246	0.177	0.212	0.288	0.186	0.233	0.152	0.152	0.216	0.25	0.663	0.284	0.18	0.3	0.166	0.15	0.15	0.197	0.247	0.252	1

## Sheet: MdNF-YCs
Gene ID	MdNF-YC1	MdNF-YC2	MdNF-YC3	MdNF-YC4	MdNF-YC5	MdNF-YC6	MdNF-YC7	MdNF-YC8	MdNF-YC9	MdNF-YC10	MdNF-YC11	MdNF-YC12
MdNF-YC1	1	0.226	0.227	0.089	0.159	0.771	0.214	0.218	0.215	0.187	0.221	0.194
MdNF-YC2	0.226	1	0.345	0.122	0.239	0.229	0.287	0.874	0.304	0.241	0.205	0.24
MdNF-YC3	0.227	0.345	1	0.106	0.219	0.23	0.339	0.35	0.276	0.231	0.204	0.201
MdNF-YC4	0.089	0.122	0.106	1	0.127	0.088	0.112	0.128	0.136	0.114	0.131	0.125
MdNF-YC5	0.159	0.239	0.219	0.127	1	0.169	0.217	0.249	0.267	0.418	0.256	0.261
MdNF-YC6	0.771	0.229	0.23	0.088	0.169	1	0.204	0.226	0.217	0.197	0.218	0.201
MdNF-YC7	0.214	0.287	0.339	0.112	0.217	0.204	1	0.286	0.257	0.22	0.221	0.243
MdNF-YC8	0.218	0.874	0.35	0.128	0.249	0.226	0.286	1	0.314	0.249	0.209	0.245
MdNF-YC9	0.215	0.304	0.276	0.136	0.267	0.217	0.257	0.314	1	0.243	0.223	0.273
MdNF-YC10	0.187	0.241	0.231	0.114	0.418	0.197	0.22	0.249	0.243	1	0.262	0.297
MdNF-YC11	0.221	0.205	0.204	0.131	0.256	0.218	0.221	0.209	0.223	0.262	1	0.235
MdNF-YC12	0.194	0.24	0.201	0.125	0.261	0.201	0.243	0.245	0.273	0.297	0.235	1
