# Supplementary material for: Expression of the Malus sieversii NF-YB21 Encoded Gene Confers Tolerance to Osmotic Stresses in Arabidopsis thaliana
Source: Int J Mol Sci. 2021 Sep 10;22(18):9777. doi: 10.3390/ijms22189777 (PMC8467963; doi:10.3390/ijms22189777)
Supplement: Supplementary file 1 [file ijms-22-09777-s001.zip › Table S5 Expression level of MsNF-Ys in different tissues and under drought treatment.xlsx]

## Sheet: root on leaf
	Leaf	Leaf	Leaf	average	Root	Root	Root	average
MsNF-YA1	1.11729	0.939523	0.952638	1.00315	4	3.50642	3.68075	3.72906
MsNF-YA2	0.911722	0.899171	1.21982	1.01024	0.487452	0.474123	0.477421	0.479665
MsNF-YA3	1.07177	1.01396	0.920188	1.00197	1.52274	1.56555	1.19471	1.42767
MsNF-YA4	1.04729	0.983957	0.97041	1.00055	4.24766	3.8282	4.2772	4.11769
MsNF-YA5	0.884745	1.11987	1.00928	1.00463	0.831238	0.872564	0.786399	0.830067
MsNF-YA6	1.14076	0.817902	1.07177	1.01015	1.19471	1.29834	1.11471	1.20259
MsNF-YA7	1.04006	1.01866	0.943874	1.00086	1.03049	0.968171	0.935191	0.977951
MsNF-YA8	0.718636	1.15936	1.20025	1.02608	7.3615	6.82108	6.54322	6.9086
MsNF-YA9	1.15936	1.1355	0.759611	1.01816	2.12874	2.28153	2.21914	2.2098
MsNF-YB1	1.08423	1.00463	0.918064	1.00231	5.68305	4.74585	4.2772	4.90204
MsNF-YB2	0.903335	1.08925	1.0163	1.00296	1.51922	1.88339	0.694157	1.36559
MsNF-YB3	0.890899	1.05214	1.06683	1.00329	1.54043	1.29534	1.20025	1.34534
MsNF-YB4	1.07425	0.608502	1.52979	1.07085	2.73208	2.37841	3.45815	2.85621
MsNF-YB5	1.38191	0.705475	1.02574	1.03771	0.941696	0.647671	0.909618	0.832995
MsNF-YB6	1.39797	1.11214	0.643197	1.0511	79.8932	73.5167	71.5064	74.9721
MsNF-YB7	1.13027	0.963707	0.918064	1.00401	18.6788	20.7255	17.5492	18.9845
MsNF-YB8	1.25411	0.761368	1.04729	1.02092	19.3376	17.918	21.0148	19.4234
MsNF-YB9	1.02101	0.97942	1	1.00014	0.399611	0.338368	0.304955	0.347645
MsNF-YB10	0.728668	1.1434	1.20025	1.02411	2.4005	2.11893	2.14851	2.22264
MsNF-YB11	1.11471	0.7457	1.20303	1.02114	3.80176	4.8121	4.45883	4.35756
MsNF-YB12	0.990801	0.997692	1.01162	1.00004	0.115023	0.119908	0.130308	0.121746
MsNF-YB13	1.28639	0.708742	1.09682	1.03065	2.10429	2.14851	2.07532	2.10937
MsNF-YB14	1.22264	0.952638	0.858565	1.01128	1.61328	1.37554	1.11729	1.3687
MsNF-YB15	0.97942	1.05702	0.965936	1.00079	0.266093	0.287175	0.279322	0.27753
MsNF-YB16	1.16205	0.97041	0.886791	1.00642	9.08404	7.17676	7.53357	7.93146
MsNF-YB17	0.97041	1.08423	0.950439	1.00169	6.66529	6.85267	7.70966	7.07587
MsNF-YB18	0.95705	1.21982	0.856584	1.01115	9.08404	8.24394	10.2912	9.20638
MsNF-YB19	1.0163	1.28639	0.764895	1.02253	10.8779	8.59402	10.6541	10.042
MsNF-YB20	1.2283	1.04729	0.777366	1.01765	1.34412	1.53333	1.04729	1.30825
MsNF-YB21	0.80107	1.34723	0.926588	1.02496	11.2356	12.295	9.91766	11.1494
MsNF-YB22	0.952638	0.965936	1.08674	1.00177	0.179659	0.187288	0.193893	0.186947
MsNF-YC1	0.939523	0.888843	1.19748	1.00862	0.868541	1.41095	1.72508	1.33486
MsNF-YC2	0.89296	1.04729	1.0693	1.00318	0.771997	0.761368	0.793701	0.775689
MsNF-YC3	0.876606	1.12506	1.01396	1.00521	0.242043	0.295931	0.295931	0.277968
MsNF-YC4	1.05702	0.870551	1.08673	1.00477	18.2522	22.9433	17.0299	19.4085
MsNF-YC5	1.07923	0.920188	1.00696	1.00212	0.33371	0.261824	0.251158	0.282231
MsNF-YC6	1.05946	1.02337	0.922316	1.00172	1.53687	1.21419	1.29235	1.34781
MsNF-YC7	1.02101	1.07923	0.907519	1.00259	1.23114	1.82766	1.53687	1.53189
MsNF-YC8	1.04247	1.23971	0.773782	1.01865	1.45397	1.56917	1.31951	1.44755
MsNF-YC9	1.17013	0.827406	1.03288	1.01014	2.53737	2.43401	3.08086	2.68408
MsNF-YC10	1.01866	0.905425	1.08423	1.00277	0.379806	0.304251	0.354371	0.346143
MsNF-YC11	1.00231	0.723635	1.37872	1.03489	2.28153	1.47427	2.14355	1.96645
MsNF-YC12	1.06437	1.04972	0.895025	1.00304	0.856584	0.788218	0.766664	0.803822

## Sheet: leaf
	0h	0h	0h	average	2h	2h	2h	average	4h	4h	4h	average	12h	12h	12h	average	24h	24h	24h	average
MsNF-YA1	1.11729	0.939523	0.952638	1.00315	0.782773	0.816014	0.886791	0.828526	1.63203	1.62076	1.35347	1.53542	0.487452	0.571701	0.575678	0.544944	0.141938	0.134282	0.146943	0.141054
MsNF-YA2	0.911722	0.899171	1.21982	1.01024	1.73708	1.59844	1.60956	1.64836	0.712025	0.287175	0.0921418	0.363781	0.423373	0.420448	0.353553	0.399125	0.172739	0.152477	0.153538	0.159585
MsNF-YA3	1.07177	1.01396	0.920188	1.00197	1.04972	0.926588	0.840896	0.939067	1.68958	1.52274	1.39152	1.53461	0.602904	0.578344	0.566442	0.582563	0.403321	0.406126	0.351111	0.386853
MsNF-YA4	1.04729	0.983957	0.97041	1.00055	1.09682	1.08925	1.10445	1.09684	2.59068	2.14851	2.03261	2.25727	1.33793	1.16473	1.02101	1.17456	0.547147	0.435275	0.429283	0.470568
MsNF-YA5	0.884745	1.11987	1.00928	1.00463	0.63728	0.678302	0.757858	0.691147	0.702222	0.752623	0.697372	0.717406	0.516438	0.614152	0.399611	0.510067	0.122428	0.129408	0.115023	0.122286
MsNF-YA6	1.14076	0.817902	1.07177	1.01015	0.876606	0.566442	1.07177	0.838274	1.27162	1.04729	1.24545	1.18812	0.578344	0.628507	0.558644	0.588498	0.510506	0.517632	0.450625	0.492921
MsNF-YA7	1.04006	1.01866	0.943874	1.00086	1.19472	1.06191	1.23685	1.16449	0.222211	0.146604	0.233258	0.200691	0.528509	0.594604	0.586417	0.569843	0.131822	0.186425	0.165702	0.161317
MsNF-YA8	0.718636	1.15936	1.20025	1.02608	0.954842	0.948246	1.27751	1.0602	0.686184	0.827406	0.715323	0.742971	0.278677	0.258219	0.251158	0.262685	0.0515935	0.0576448	0.116091	0.0751099
MsNF-YA9	1.15936	1.1355	0.759611	1.01816	2.57279	2.48515	1.42734	2.16176	8.81524	7.31065	6.9163	7.68073	1.90968	1.79419	1.66248	1.78878	0.087981	0.136156	0.215138	0.146425
MsNF-YB1	1.08423	1.00463	0.918064	1.00231	0.860551	0.6846	1.02337	0.856175	1.49831	1.20025	1.51922	1.40593	0.619854	0.594604	0.447513	0.55399	0.539614	0.594604	0.566442	0.566887
MsNF-YB2	0.903335	1.08925	1.0163	1.00296	2.08493	1.28343	1.30134	1.55657	3.03143	3.41054	3.91768	3.45322	0.23272	0.163421	0.181327	0.192489	2.22942	1.64338	1.67791	1.85024
MsNF-YB3	0.890899	1.05214	1.06683	1.00329	1.60214	1.69349	1.48452	1.59338	4.16986	3.63008	4.40762	4.06919	0.357661	0.320116	0.347881	0.341886	2.18354	1.96791	2.22942	2.12696
MsNF-YB4	1.07425	0.608502	1.52979	1.07085	0.616996	0.600124	1.00928	0.742135	2.18859	1.28343	2.54912	2.00704	0.390483	0.354371	0.33294	0.359265	2.66352	1.84463	3.05958	2.52258
MsNF-YB5	1.38191	0.705475	1.02574	1.03771	0.862542	0.690956	0.516438	0.689979	0.587774	0.600124	0.454809	0.547569	0.63581	0.4954	0.408007	0.513072	0.102711	0.090037	0.112396	0.101715
MsNF-YB6	1.39797	1.11214	0.643197	1.0511	1.15135	1.19196	1.54043	1.29458	2.37841	1.58008	1.24833	1.73561	0.114493	0.16532	0.135216	0.138343	2.46798	2.45094	2.38392	2.43428
MsNF-YB7	1.13027	0.963707	0.918064	1.00401	1.16205	1.28937	1.45062	1.30068	2.7384	2.83497	2.16345	2.57894	1.38191	1.09936	1.28937	1.25688	1.92741	1.81085	1.77358	1.83728
MsNF-YB8	1.25411	0.761368	1.04729	1.02092	0.542113	0.681444	0.695762	0.639773	1.44727	0.988514	0.922316	1.11937	0.163421	0.130007	0.099903	0.13111	0.963707	0.899171	1.01162	0.958166
MsNF-YB9	1.02101	0.97942	1	1.00014	1.13288	0.926588	0.920188	0.99322	1.23685	1.01866	0.880666	1.04539	0.846745	0.888843	0.882703	0.872764	0.166086	0.123279	0.126745	0.138703
MsNF-YB10	0.728668	1.1434	1.20025	1.02411	1.27456	1.51572	1.39474	1.39501	3.73213	4.05584	3.16017	3.64938	0.481854	0.80478	0.585064	0.623899	1.76133	2.18354	1.95432	1.9664
MsNF-YB11	1.11471	0.7457	1.20303	1.02114	1.25992	1.08172	1.05214	1.13126	1.42734	1.44727	1.49831	1.45764	1.02101	0.972655	1.02101	1.00489	0.726986	0.678302	0.632878	0.679389
MsNF-YB12	0.990801	0.997692	1.01162	1.00004	0.842842	0.698985	0.733736	0.758521	0.852635	0.870551	0.840896	0.854694	0.597358	0.705475	0.750886	0.684573	0.310644	0.359318	0.33064	0.333534
MsNF-YB13	1.28639	0.708742	1.09682	1.03065	1.28343	1.24833	1.47427	1.33534	3.55537	4.02782	5.57897	4.38739	0.405189	0.245989	0.41658	0.355919	2.66968	3.06666	3.72352	3.15329
MsNF-YB14	1.22264	0.952638	0.858565	1.01128	1.77358	1.39152	1.28046	1.48186	4.39745	4.01853	3.88164	4.09921	0.274206	0.291857	0.295931	0.287331	1.88339	2.00463	1.84463	1.91088
MsNF-YB15	0.97942	1.05702	0.965936	1.00079	0.640232	0.422396	0.618423	0.56035	0.538369	0.428292	0.44648	0.471047	0.366868	0.295931	0.259415	0.307405	0.0653048	0.053044	0.0617821	0.0600436
MsNF-YB16	1.16205	0.97041	0.886791	1.00642	0.609909	0.367717	0.593231	0.523619	0.698985	0.51883	0.848704	0.68884	0.23761	0.155681	0.11162	0.168304	0.756109	0.777366	0.658231	0.730569
MsNF-YB17	0.97041	1.08423	0.950439	1.00169	0.890899	0.954842	1.15136	0.999032	1.92297	2.13366	2.06098	2.0392	0.97942	0.965936	1.33793	1.09443	0.757858	0.90125	1.03526	0.898125
MsNF-YB18	0.95705	1.21982	0.856584	1.01115	1.04729	1.35347	0.899171	1.09998	1.217	1.46747	1.67404	1.45284	0.158952	0.150378	0.197055	0.168795	1.38191	1.52274	1.51222	1.47229
MsNF-YB19	1.0163	1.28639	0.764895	1.02253	0.664343	0.993093	0.876606	0.84468	2.78949	3.50642	5.02805	3.77465	0.686184	0.720298	0.756109	0.720864	2.8219	3.74942	3.54717	3.37283
MsNF-YB20	1.2283	1.04729	0.777366	1.01765	1.61702	1.99078	1.23399	1.61393	2.87454	2.45094	1.96337	2.42962	0.339151	0.15822	0.233258	0.243543	2	2.17347	1.84038	2.00462
MsNF-YB21	0.80107	1.34723	0.926588	1.02496	0.272942	0.39685	0.658231	0.442674	16.0741	17.9594	10.1027	14.7121	5.5149	4.51064	3.23403	4.41986	9.9636	8.85607	8.6139	9.14452
MsNF-YB22	0.952638	0.965936	1.08674	1.00177	0.527289	0.527289	0.577009	0.543862	0.490843	0.442372	0.457973	0.463729	0.432269	0.378929	0.346277	0.385825	0.130007	0.127332	0.135528	0.130956
MsNF-YC1	0.939523	0.888843	1.19748	1.00862	1.06437	0.846745	1.09429	1.0018	1.4811	1.46071	1.41095	1.45092	0.742262	0.707107	0.752623	0.733997	0.835088	0.852635	0.920188	0.869304
MsNF-YC2	0.89296	1.04729	1.0693	1.00318	1.10701	1.37237	1.47087	1.31675	1.01396	1.18921	1.19748	1.13355	0.482968	0.687771	0.664343	0.611694	0.464366	0.374577	0.23871	0.359218
MsNF-YC3	0.876606	1.12506	1.01396	1.00521	1.41095	1.45062	1.06191	1.30783	0.759611	0.791869	0.928731	0.826737	0.876606	0.90125	1.27456	1.01747	0.827406	0.899171	0.730353	0.818977
MsNF-YC4	1.05702	0.870551	1.08673	1.00477	8.09296	7.44704	5.88347	7.14115	1.28937	0.63581	0.658231	0.861137	0.501157	0.41851	0.470848	0.463505	3.63847	4.06522	2.64512	3.4496
MsNF-YC5	1.07923	0.920188	1.00696	1.00212	0.721965	0.493116	0.721965	0.645682	0.844791	0.589134	0.710382	0.714769	0.429283	0.343885	0.366021	0.37973	0.121582	0.111105	0.10083	0.111172
MsNF-YC6	1.05946	1.02337	0.922316	1.00172	1.15135	1.08925	0.21071	0.817105	1.77768	1.6358	1.60214	1.67188	0.878633	0.73884	0.656712	0.758062	0.579682	0.548412	0.497695	0.54193
MsNF-YC7	1.02101	1.07923	0.907519	1.00259	1.99538	2.68825	2.92141	2.53502	2.05148	2.74473	2.76383	2.52001	4.00925	4.15064	4.0935	4.08446	2.78305	3.02444	2.94173	2.91641
MsNF-YC8	1.04247	1.23971	0.773782	1.01865	1.36604	1.72907	1.56917	1.55476	4.3873	4.76783	5.03968	4.73161	1.47768	1.5728	1.34102	1.46383	2.32409	2.10916	3.1748	2.53602
MsNF-YC9	1.17013	0.827406	1.03288	1.01014	2.35653	2.47369	2.42279	2.41767	9.60199	12.2383	11.2615	11.034	1.87471	1.64338	1.47087	1.66299	0.304955	0.322343	0.288505	0.305268
MsNF-YC10	1.01866	0.905425	1.08423	1.00277	0.862542	0.838956	0.816014	0.839171	0.754364	0.872564	0.897095	0.841341	0.399611	0.276752	0.405189	0.360517	0.112396	0.095171	0.104869	0.104145
MsNF-YC11	1.00231	0.723635	1.37872	1.03489	1.74513	0.831238	1.08173	1.21936	3.11666	2.41162	1.89211	2.47346	0.487452	0.407066	0.310644	0.401721	2.08975	1.58374	2.03261	1.90203
MsNF-YC12	1.06437	1.04972	0.895025	1.00304	1.11729	1.02101	0.895025	1.01111	1.52274	1.43065	1.46071	1.47136	0.721965	0.678302	0.712025	0.704097	0.266093	0.236514	0.246558	0.249722

## Sheet: fold change exceed 2 in leaf
fold change exceed 2 at 2,4,12,24h after drought treatment in leaf
≥2	≥4
MsNF-YA4	MsNF-YA9
MsNF-YA9	MsNF-YB3
MsNF-YB2	MsNF-YB13
MsNF-YB3	MsNF-YB14
MsNF-YB4	MsNF-YB21
MsNF-YB6	MsNF-YC4
MsNF-YB7	MsNF-YC7
MsNF-YB10	MsNF-YC8
MsNF-YB13	MsNF-YC9
MsNF-YB14
MsNF-YB17
MsNF-YB19
MsNF-YB20
MsNF-YB21
MsNF-YC4
MsNF-YC7
MsNF-YC8
MsNF-YC9
MsNF-YC11

## Sheet: Root
	0h	0h	0h	average	2h	2h	2h	average	4h	4h	4h	average	12h	12h	12h	average	24h	24h	24h	average
MsNF-YA1	1.07425	0.941696	0.988514	1.00149	0.490843	0.448548	0.347078	0.428823	0.63728	0.5	0.503478	0.546919	1.59475	1.50873	1.54043	1.54797	2.9622	2.70695	2.66968	2.77961
MsNF-YA2	1.0163	0.988514	0.99539	1.00007	1.14076	1.3566	1.16473	1.2207	0.407066	0.537126	0.600124	0.514772	0.97716	1.08423	1.08423	1.04854	1.54043	1.73307	1.85746	1.71032
MsNF-YA3	1.07425	1.10445	0.842842	1.00718	0.364334	0.31498	0.259415	0.31291	0.37285	0.352737	0.355191	0.360259	0.283876	0.255843	0.259415	0.266378	0.370274	0.296616	0.300756	0.322549
MsNF-YA4	1.03288	0.93088	1.04006	1.00127	0.609909	0.577009	0.481854	0.556257	0.436282	0.433269	0.398688	0.422746	0.50581	0.391387	0.46544	0.454212	0.602904	0.697372	0.532185	0.61082
MsNF-YA5	1.00231	1.05215	0.948246	1.0009	1.05215	0.99539	0.825496	0.957677	0.278677	0.280616	0.370274	0.309856	0.279968	0.310644	0.302149	0.297587	0.175962	0.16532	0.161918	0.167733
MsNF-YA6	0.99539	1.08173	0.928731	1.00195	0.571701	0.442372	0.395934	0.470002	0.413703	0.449585	0.383332	0.41554	0.484085	0.556068	0.508152	0.516102	0.553504	0.48858	0.419478	0.487187
MsNF-YA7	1.05458	0.990801	0.95705	1.00081	0.412748	0.66588	0.786399	0.621676	0.405189	0.549681	0.462225	0.472365	0.61132	0.578344	0.598739	0.596135	0.943874	1.05458	1.08423	1.02756
MsNF-YA8	1.06683	0.988514	0.948246	1.0012	1.15669	1.17283	0.895025	1.07485	0.240371	0.191224	0.154249	0.195281	0.150378	0.102711	0.191666	0.148252	0.199344	0.1966	0.218141	0.204695
MsNF-YA9	0.963707	1.03288	1.00463	1.0004	0.100598	0.072628	0.176369	0.116532	0.607097	0.496546	0.447513	0.517052	2.02324	1.96791	1.73708	1.90941	4.46915	3.68075	3.09513	3.74834
MsNF-YB1	1.16743	0.974905	0.878633	1.00699	0.872564	0.670511	0.718636	0.753904	0.864537	0.619854	0.773783	0.752725	1.12766	1.00928	1.06683	1.06793	1.4914	1.34412	1.32562	1.38705
MsNF-YB2	1.2086	1.49831	0.552227	1.08638	16.1486	12.758	14.1559	14.3542	9.98664	7.21	8.39773	8.53146	6.29119	8.30128	8.07428	7.55558	23.2099	24.0284	25.223	24.1537
MsNF-YB3	1.15136	0.968171	0.897095	1.00554	15.5985	12.0698	12.3234	13.3306	6.77396	5.73582	5.61778	6.04252	7.17676	7.37853	7.17676	7.24402	21.0634	20.2054	17.2278	19.4989
MsNF-YB4	0.968171	0.842842	1.22547	1.01216	12.9361	11.8214	12.5824	12.4466	4.84557	3.88164	5.33936	4.68886	3.79298	3.18951	3.21169	3.39806	10.2437	8.09296	10.2437	9.52679
MsNF-YB5	1.14605	0.788218	1.10701	1.01376	1.08423	1.09936	1.04729	1.07696	0.358489	0.386891	0.363493	0.369624	0.272942	0.256435	0.265478	0.264952	0.566442	0.50698	0.496546	0.523323
MsNF-YB6	1.06683	0.981686	0.954842	1.00112	0.909618	0.842842	0.759611	0.837357	0.313528	0.338368	0.280616	0.310837	0.16647	0.156402	0.122711	0.148528	0.331405	0.278677	0.260015	0.290032
MsNF-YB7	0.986233	1.09429	0.926588	1.00237	0.933033	0.721965	1.08674	0.913911	1.217	1.05215	1.18372	1.15096	1.21419	1.12506	1.06437	1.13454	1.48796	1.1355	1.39797	1.34048
MsNF-YB8	0.997692	0.92445	1.08423	1.00212	1.53333	1.32562	1.23685	1.36526	0.806642	0.692555	0.779165	0.759454	0.300756	0.231112	0.280616	0.270828	0.952638	0.812252	0.939523	0.901471
MsNF-YB9	1.15669	0.97942	0.882703	1.00627	4.53154	4.11245	2.96905	3.87101	2.10429	1.81924	1.63959	1.85437	1.89211	1.56917	1.42405	1.62844	3.46615	2.64512	3.12387	3.07838
MsNF-YB10	1.08172	0.954842	0.968171	1.00158	8.59402	8.53466	9.02129	8.71666	4.05584	4.25748	4.14106	4.15146	4.29701	3.61334	3.76678	3.89238	10.315	10.753	12.1819	11.0833
MsNF-YB11	0.876606	1.10957	1.02811	1.00476	0.602904	0.607097	0.598739	0.602914	0.622725	0.530957	0.585064	0.579582	0.97942	1.26576	1.1487	1.13129	1.04488	0.981686	0.802923	0.943162
MsNF-YB12	0.946058	0.986233	1.07177	1.00135	2.84153	2.70695	2.66968	2.73938	6.3496	5.9656	5.45155	5.92225	2.03731	1.92741	1.67791	1.88088	2.96219	2.80241	2.88119	2.88193
MsNF-YB13	0.997692	1.01866	0.983957	1.0001	12.0977	7.49884	8.43663	9.3444	5.29024	4.90187	5.43897	5.21036	4.84557	5.80247	5.30248	5.31684	18.0009	17.1484	16.5642	17.2378
MsNF-YB14	1.19196	1.0163	0.825496	1.01125	12.4955	9.80375	8.41716	10.2388	5.93809	5.02805	5.35171	5.43929	6.78963	6.51305	6.83686	6.71318	21.6556	17.3476	18.8523	19.2852
MsNF-YB15	0.959264	1.03526	1.00696	1.00049	0.528509	0.450625	0.45376	0.477631	0.340722	0.256435	0.249423	0.282193	0.574349	0.554785	0.503478	0.544204	0.890899	0.825496	0.897095	0.871163
MsNF-YB16	1.15135	0.909618	0.954842	1.00527	2.68205	3.16748	3.49026	3.11326	1.37237	1.11471	1.00463	1.1639	0.770215	0.73884	0.612734	0.707263	1.76133	1.63203	1.82344	1.73894
MsNF-YB17	0.943874	0.97041	1.09177	1.00202	0.545884	0.577009	0.573024	0.565306	0.501157	0.526072	0.515246	0.514158	0.93088	0.844791	0.833161	0.869611	0.726986	0.812252	0.747425	0.762221
MsNF-YB18	0.990801	0.899171	1.12246	1.00414	3.45017	3.28676	3.49833	3.41175	2.02792	2.04202	2.36198	2.14398	1.01866	1.01162	1.14605	1.05877	2.53151	2.04202	2.14355	2.23903
MsNF-YB19	1.08925	0.860551	1.06683	1.00554	2.51984	2.11893	2.3511	2.32995	1.28343	1.32869	1.39474	1.33562	1.79419	1.96337	1.7818	1.84645	4.52108	4.39745	3.64689	4.18847
MsNF-YB20	1.04006	1.18646	0.810378	1.0123	12.0977	8.6139	10.1027	10.2714	5.70938	4.17951	5.21741	5.03543	5.6438	5.48947	4.9818	5.37169	13.6422	15.3482	14.2215	14.404
MsNF-YB21	1.01162	1.10701	0.89296	1.00386	0.434271	0.48858	0.509328	0.477393	0.779165	1.68179	0.697372	1.05278	0.95705	1.09936	0.93088	0.995764	0.254664	0.205423	0.22324	0.227776
MsNF-YB22	0.961483	1.00231	1.03766	1.00049	1.43396	1.45397	1.28343	1.39045	3.16017	3.09513	3.45815	3.23781	0.655197	0.566442	0.664343	0.628661	1.50525	1.50525	1.51572	1.50874
MsNF-YC1	0.676737	1.09936	1.34412	1.04007	1.20303	1.12246	1.29834	1.20794	1.28343	1.11729	1.15669	1.1858	1.36289	1.26283	1.53333	1.38635	1.29235	1.20581	1.11729	1.20515
MsNF-YC2	0.99539	0.981686	1.02337	1.00015	0.993092	1.1019	1.00696	1.03398	0.594604	0.466516	0.846745	0.635955	0.653685	0.577009	0.597358	0.609351	0.339936	0.255843	0.424352	0.340044
MsNF-YC3	0.874583	1.0693	1.0693	1.00439	1.00231	1.06683	1.45734	1.17549	3.98156	3.68926	4.83439	4.1684	0.526072	0.522439	0.604299	0.550937	0.579682	0.497695	0.490843	0.52274
MsNF-YC4	0.948246	1.19196	0.884745	1.00832	5.2537	3.21169	2.45094	3.63878	1.51572	1.79005	0.852635	1.38613	1.47768	1.29534	1.09682	1.28995	2.86129	1.95432	3.06666	2.62742
MsNF-YC5	1.19196	0.935191	0.897095	1.00808	1.44727	0.988514	1.2086	1.21479	1.28046	1.15402	1.23685	1.22378	1.15936	1.06683	0.948246	1.05815	0.97041	0.905425	1.01866	0.96483
MsNF-YC6	1.14605	0.905425	0.963707	1.00506	0.911722	0.810378	0.816014	0.846038	1.06437	0.852635	0.864537	0.927181	1.27162	1.10701	1.20303	1.19388	1.45397	1.13288	1.36604	1.31763
MsNF-YC7	0.814131	1.2086	1.01631	1.01301	0.961483	0.981686	0.884745	0.942638	0.302848	0.66742	0.658231	0.542833	0.442372	0.494257	0.587774	0.508134	0.1966	0.228986	0.242043	0.222543
MsNF-YC8	1.00696	1.08674	0.913831	1.00251	0.260015	0.284533	0.23272	0.259089	5.08648	4.30695	3.64689	4.34677	0.412748	0.424352	0.235424	0.357508	0.590496	0.582367	0.562529	0.578464
MsNF-YC9	0.950439	0.911722	1.15402	1.00539	1.51222	1.4406	1.50177	1.48486	0.913831	0.82932	1.00696	0.916702	0.93088	0.799221	0.80478	0.84496	0.400535	0.334482	0.307786	0.347601
MsNF-YC10	1.1019	0.882703	1.02811	1.00424	1.59107	1.54757	1.47427	1.53764	1.76949	1.62826	1.7818	1.72652	1.43396	1.28343	1.28343	1.3336	1.49831	1.12766	1.32256	1.31618
MsNF-YC11	1.18099	0.76313	1.10957	1.0179	14.0257	12.7286	11.4716	12.742	6.03491	5.36409	5.66994	5.68965	3.34035	2.77022	3.05252	3.05436	10.3627	9.80375	10.1495	10.1053
MsNF-YC12	1.06683	0.981686	0.954842	1.00112	0.897095	0.802923	0.770215	0.823411	0.649169	0.553504	0.502316	0.56833	0.764895	0.698985	0.621288	0.695056	0.601513	0.498846	0.491978	0.530779

## Sheet: fold change exceed 2 in root
fold change exceed 2 at 2,4,12,24h after drought treatment in root
≥2	≥4
MsNF-YA1	MsNF-YB2
MsNF-YA9	MsNF-YB3
MsNF-YB2	MsNF-YB4
MsNF-YB3	MsNF-YB10
MsNF-YB4	MsNF-YB12
MsNF-YB9	MsNF-YB13
MsNF-YB10	MsNF-YB14
MsNF-YB12	MsNF-YB19
MsNF-YB13	MsNF-YB20
MsNF-YB14	MsNF-YC3
MsNF-YB16	MsNF-YC8
MsNF-YB18	MsNF-YC11
MsNF-YB19
MsNF-YB20
MsNF-YB22
MsNF-YC3
MsNF-YC4
MsNF-YC8
MsNF-YC11
