# Supplementary material for: Expression of the Malus sieversii NF-YB21 Encoded Gene Confers Tolerance to Osmotic Stresses in Arabidopsis thaliana
Source: Int J Mol Sci. 2021 Sep 10;22(18):9777. doi: 10.3390/ijms22189777 (PMC8467963; doi:10.3390/ijms22189777)
Supplement: Supplementary file 1 [file ijms-22-09777-s001.zip › Table S8 Accession Numbers.xlsx]

## Sheet: Sheet1
Symbol	Accession Numbers		Symbol	Accession Numbers		Symbol	Accession Numbers
AtNF-YA1	AT5G12840		PpNF-YA1	Prupe.2G014500		Apple Histone H3	MD08G1187800
AtNF-YA2	AT3G05690		PpNF-YA2	Prupe.3G043900
AtNF-YA3	AT1G72830		PpNF-YA3	Prupe.4G090200
AtNF-YA4	AT2G34720		PpNF-YA4	Prupe.4G249900
AtNF-YA5	AT1G54160		PpNF-YA5	Prupe.7G093100
AtNF-YA6	AT3G14020		PpNF-YA6	Prupe.7G203500
AtNF-YA7	AT1G30500		PpNF-YB1	Prupe.1G138500
AtNF-YA8	AT1G17590		PpNF-YB2	Prupe.2G219500
AtNF-YA9	AT3G20910		PpNF-YB3	Prupe.3G197300
AtNF-YA10	AT5G06510		PpNF-YB4	Prupe.4G003800
AtNF-YB1	AT2G38880		PpNF-YB5	Prupe.4G004200
AtNF-YB2	AT5G47640		PpNF-YB6	Prupe.4G242700
AtNF-YB3	AT4G14540		PpNF-YB7	Prupe.4G243500
AtNF-YB4	AT1G09030		PpNF-YB8	Prupe.4G273800
AtNF-YB5	AT2G47810		PpNF-YB9	Prupe.6G175100
AtNF-YB6	AT5G47670		PpNF-YB10	Prupe.6G241800
AtNF-YB7	AT2G13570		PpNF-YB11	Prupe.6G323400
AtNF-YB8	AT2G37060		PpNF-YB12	Prupe.8G256000
AtNF-YB9	AT1G21970		PpNF-YC1	Prupe.1G152500
AtNF-YB10	AT3G53340		PpNF-YC2	Prupe.3G149300
AtNF-YB11	AT2G27470		PpNF-YC3	Prupe.4G132200
AtNF-YB12	AT5G08190		PpNF-YC4	Prupe.5G096000
AtNF-YB13	AT5G23090		PpNF-YC5	Prupe.5G150400
AtNF-YC1	AT3G48590		PpNF-YC6	Prupe.6G328500
AtNF-YC2	AT1G56170
AtNF-YC3	AT1G54830
AtNF-YC4	AT5G63470
AtNF-YC5	AT5G50490
AtNF-YC6	AT5G50480
AtNF-YC7	AT5G50470
AtNF-YC8	AT5G27910
AtNF-YC9	AT1G08970
AtNF-YC10	AT1G07980
AtNF-YC11	AT3G12480
AtNF-YC12	AT5G38140
AtNF-YC13	AT5G43250
AtFSD1	At4g25100
AtFSD2	At5g51100
AtFSD3	At5g23310
AtCSD1	AT1G08830
AtCSD2	At2g28190
AtCSD3	At5g18100
AtMSD	At3g10920
AtCAT1	AT1G20630
AtCAT2	AT4G35090
AtCAT3	AT1G20620
AtPER12	AT1G71695
AtPER34	AT3G49120
AtPER42	AT4G21960
AtPER51	AT4G37530
AtACT2	AT3G18780
